# Supplementary material
Source: Springer Nature journal article supplement (https://www.springermedizin.de/resource/supplementary/12904_2011_124_MOESM1_ESM.pdf/9517628)

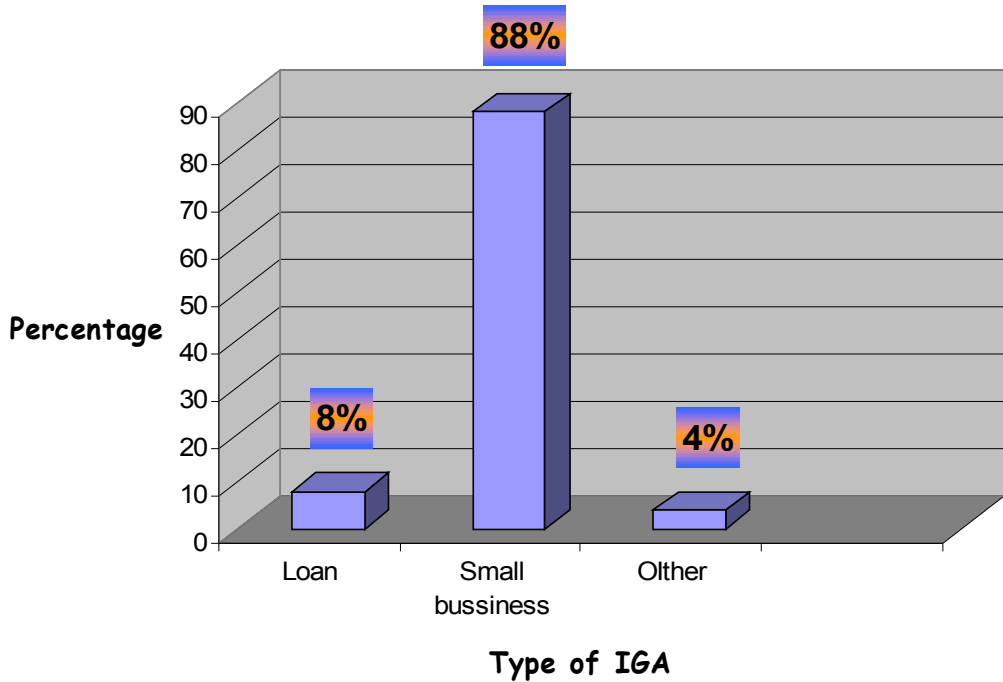

Supplement: MOESM1 [file 9517628]
